# Supplementary material for: Singlet oxygen production in Chlamydomonas reinhardtii under heat stress
Source: PubMed Central journal article supplement (PMC4757480; doi:10.1038/srep20094), 2016-02-01
Supplement: srep20094-s1.pdf [file srep20094-s1.pdf]

**Singlet oxygen production in *Chlamydomonas reinhardtii* under heat stress**

Ankush Prasad, Ursula Ferretti, Michaela Sedlářová, Pavel Pospíšil

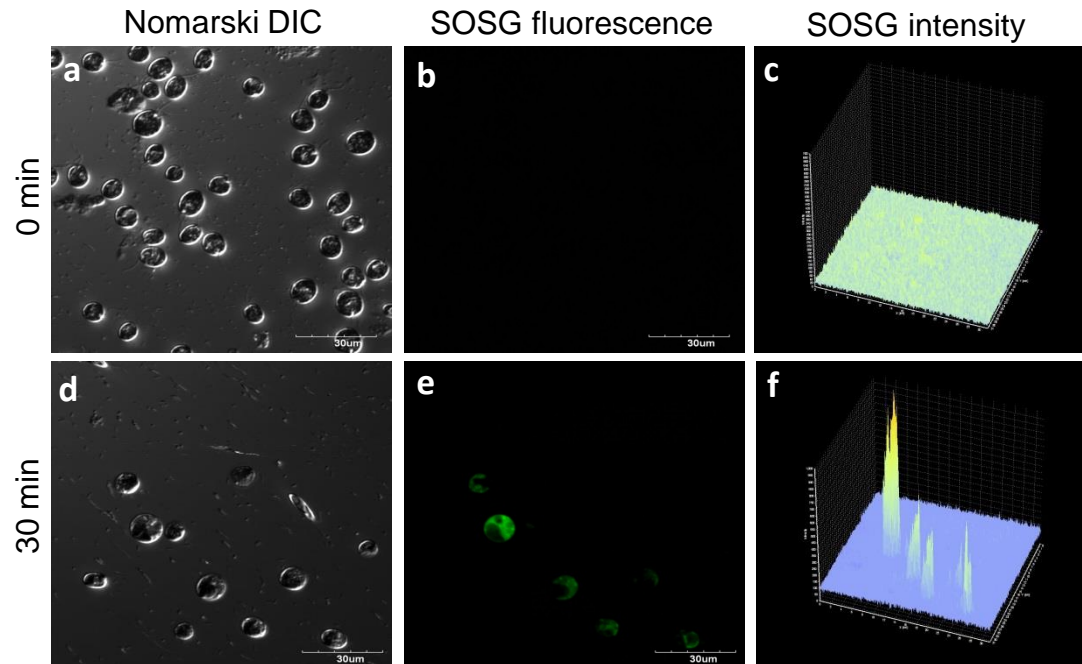

*Supplementary data 1: Detection of singlet oxygen in multiple cells of Chlamydomonas by laser confocal scanning microscopy. Chlamydomonas cells at room temperature and heated at 40 °C during 30 min of SOSG staining as detected by confocal laser scanning microscope ( $\lambda_{ex}$ =488nm,  $\lambda_{em}$ =505-525nm). The images represent (from left to right) Nomarski DIC, SOSG fluorescence and distribution of SOSG intensity in and among different cells.*

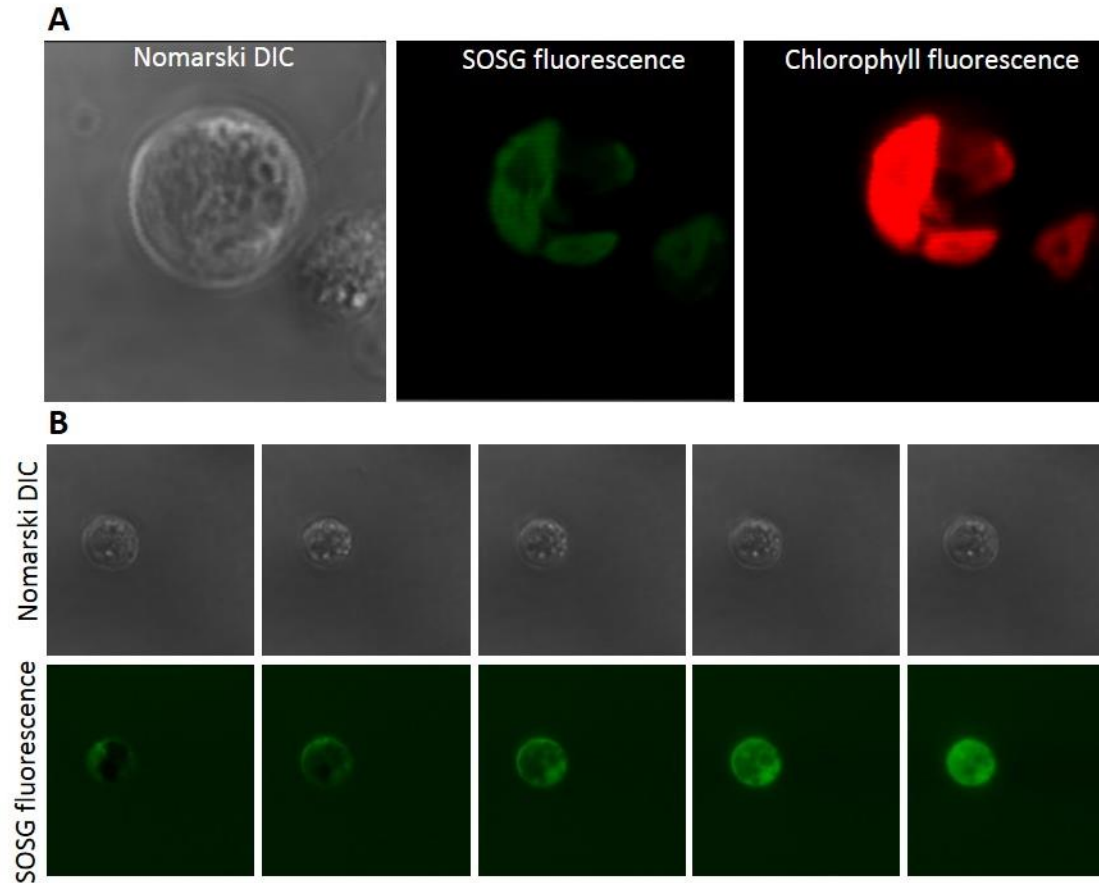

**Supplementary data 2: Detection and localization of singlet oxygen formation in *Chlamydomonas* cells by laser confocal scanning microscopy (A); *Chlamydomonas* cells heated at 40 °C during 30 min of SOSG staining as detected by confocal laser scanning microscope ( $\lambda_{\text{ex}}=488\text{nm}$ ,  $\lambda_{\text{em}}=505\text{-}525\text{nm}$ ). The images represent (from left to right) Nomarski DIC, SOSG fluorescence and chlorophyll fluorescence distribution. (B); Localization of  $^1\text{O}_2$  in heated (30 min) *Chlamydomonas* cells using SOSG fluorescence measured in the multiple layers of *Chlamydomonas* cells.**
